# Supplementary material
Source: Research Square preprint supplement (doi:10.21203/rs.3.rs-6506544/v1)
Supplement: Supplementary file 1 [file 038e9334d67f0cf64dab5dde.docx]

**Supplementary data**


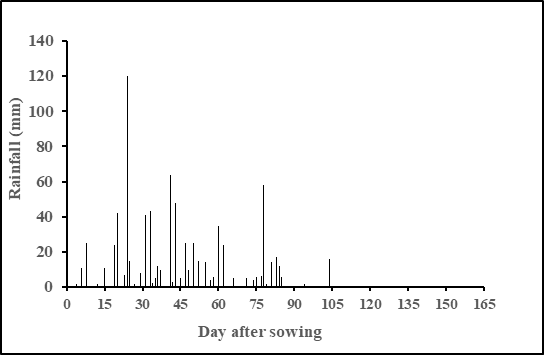

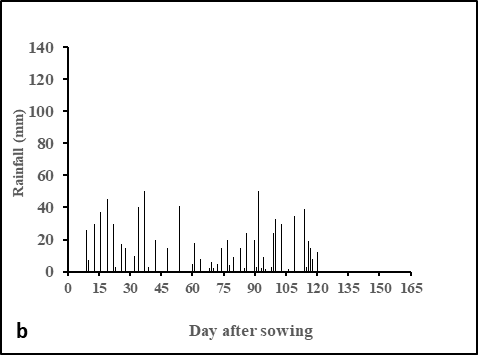


**a**

**Figure S1.** Rainfall pattern during the 2019 growing season at the experimental sites of Okpara (a) and Angaradebou (b).
